# Supplementary material for: In situ moulded troilite 2H phase FeS ultrathin electrodes via pulsed laser deposition for flexible solid state high capacity supercapacitor besides boosted electrocatalytic oxygen evolution reaction
Source: Royal Society of Chemistry journal article supplement (doi:10.1039/d2ta08817g), 2023-01-01
Supplement: d2ta08817g1.pdf [file d2ta08817g1.pdf]

# ***In situ* moulded Troilite 2H phase Fe S ultrathin electrodes via Pulsed Laser Deposition for Flexible Solid State High Capacity Supercapacitor besides boosted electrocatalytic oxygen evolution reaction**

**Ramasamy Velmurugan<sup>a,b,#</sup>, Dekshinamoorthy Amuthan<sup>a,b,#</sup>, Vijayaraghavan Saranyan<sup>a,b,\*</sup>, Balasubramanian Subramanian<sup>a,b,\*</sup>**

<sup>a</sup>CSIR- Central Electrochemical Research Institute, Karaikudi- 630 003, Tamil Nadu, India.

<sup>b</sup>Academy of Scientific and Innovative Research (AcSIR), Ghaziabad- 201 002, India.

# Authors contributed equally

\*Corresponding Author: [saranyan@cecri.res.in](mailto:saranyan@cecri.res.in) (Vijayaraghavan Saranyan),  
[bsmanian@cecri.res.in](mailto:bsmanian@cecri.res.in) (Balasubramanian Subramanian)

## **Formulae for Evaluation of capacitances, capacities, energy and power densities**

### **Areal and Volumetric capacitances with respect to Scan rates**

$$C_{(A)} = \frac{i \oint dV}{A \vartheta \Delta V} \left( \frac{mF}{cm^2} \right) \text{----- (1)}$$

$$C_{(V)} = \frac{i \oint dV}{V \vartheta \Delta V} \left( \frac{F}{cm^3} \right) \text{----- (2)}$$

### **Areal and Volumetric capacitances with respect to Current density rates**

$$C_{(Areal)} = \frac{I \oint dt}{A \Delta V} \left( \frac{mF}{cm^2} \right) \text{----- (3)}$$

$$C_{(Vol)} = \frac{I \oint dt}{V \Delta V} \left( \frac{F}{cm^3} \right) \text{----- (4)}$$

**Volumetric capacity with respect to Current density rates**

$$C_{sp.v.} C_{cap} = \frac{i * dt}{3.6V} \left( \frac{mAh}{cm^3} \right) \text{----- (5)}$$

**Volumetric specific Energy**

$$E_V = \frac{C_{DV}}{3.6} \left( \frac{mWh}{cm^3} \right) \text{----- (6)}$$

**Volumetric specific Power**

$$P_V = \frac{E}{dt} \times 3.6 \left( \frac{W}{cm^3} \right) \text{----- (7)}$$

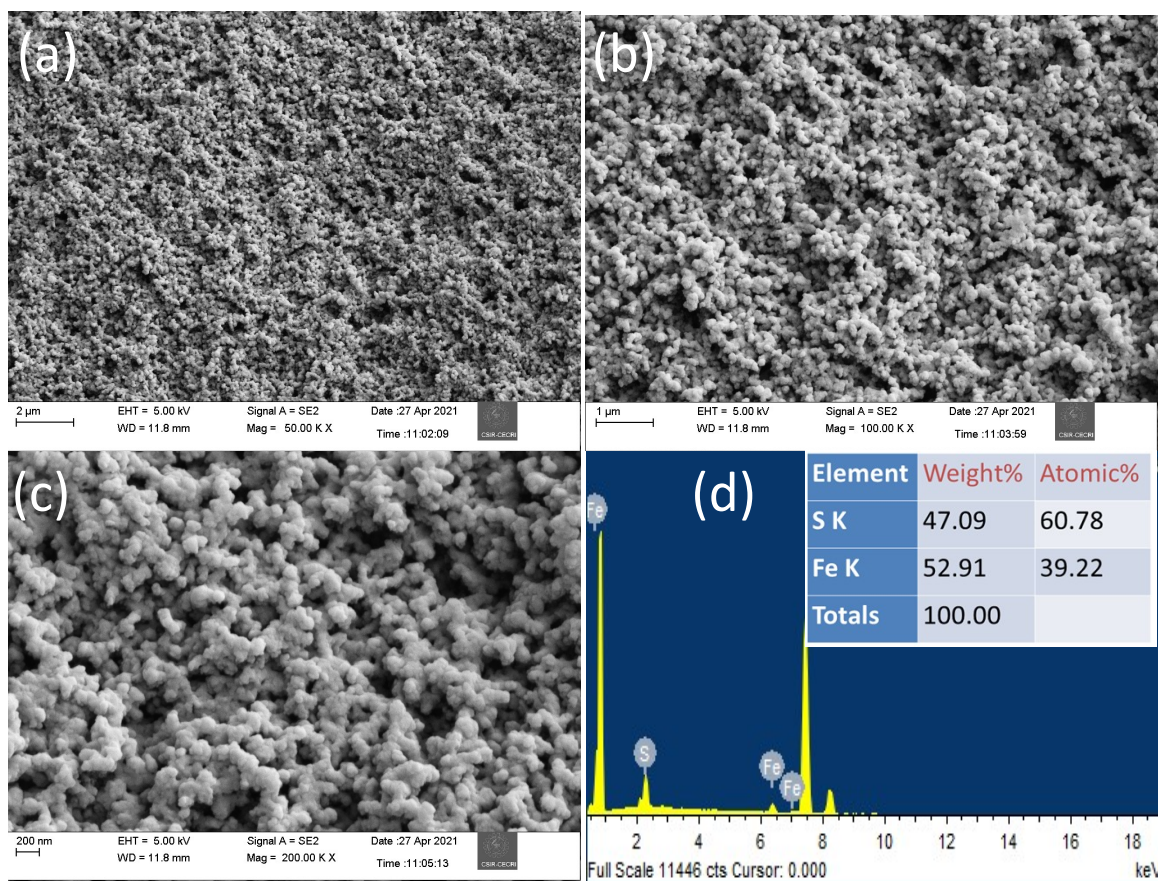

**Figure S1:** (a-c) FESEM morphologies of FeS thin film RT; (d) EDAX spectrum of FeS thin film RT

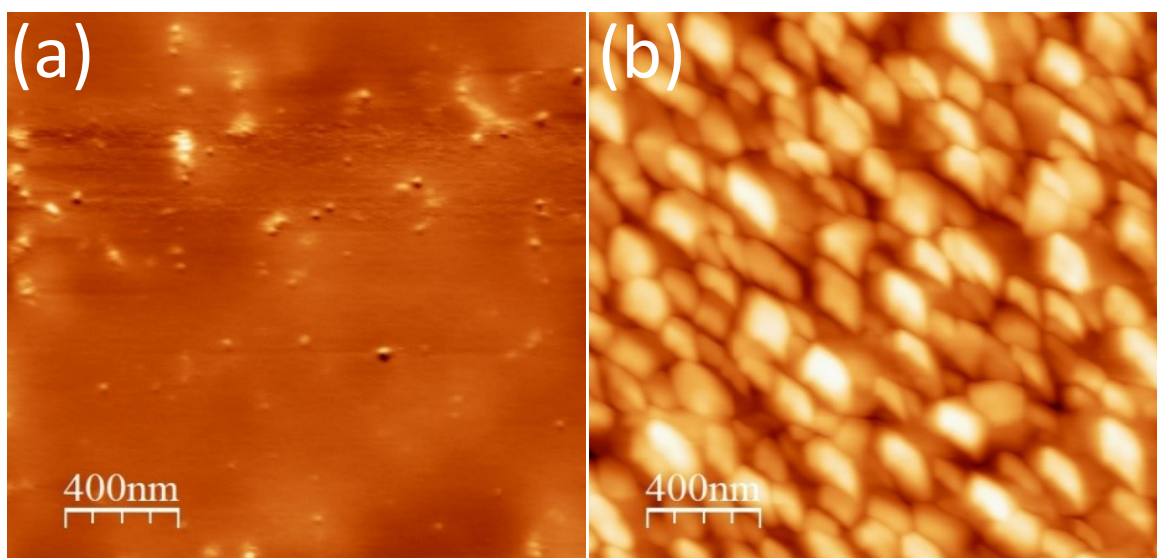

**Figure S2:** AFM 2D and 3D topographical images of FeS thin films RT and A650.

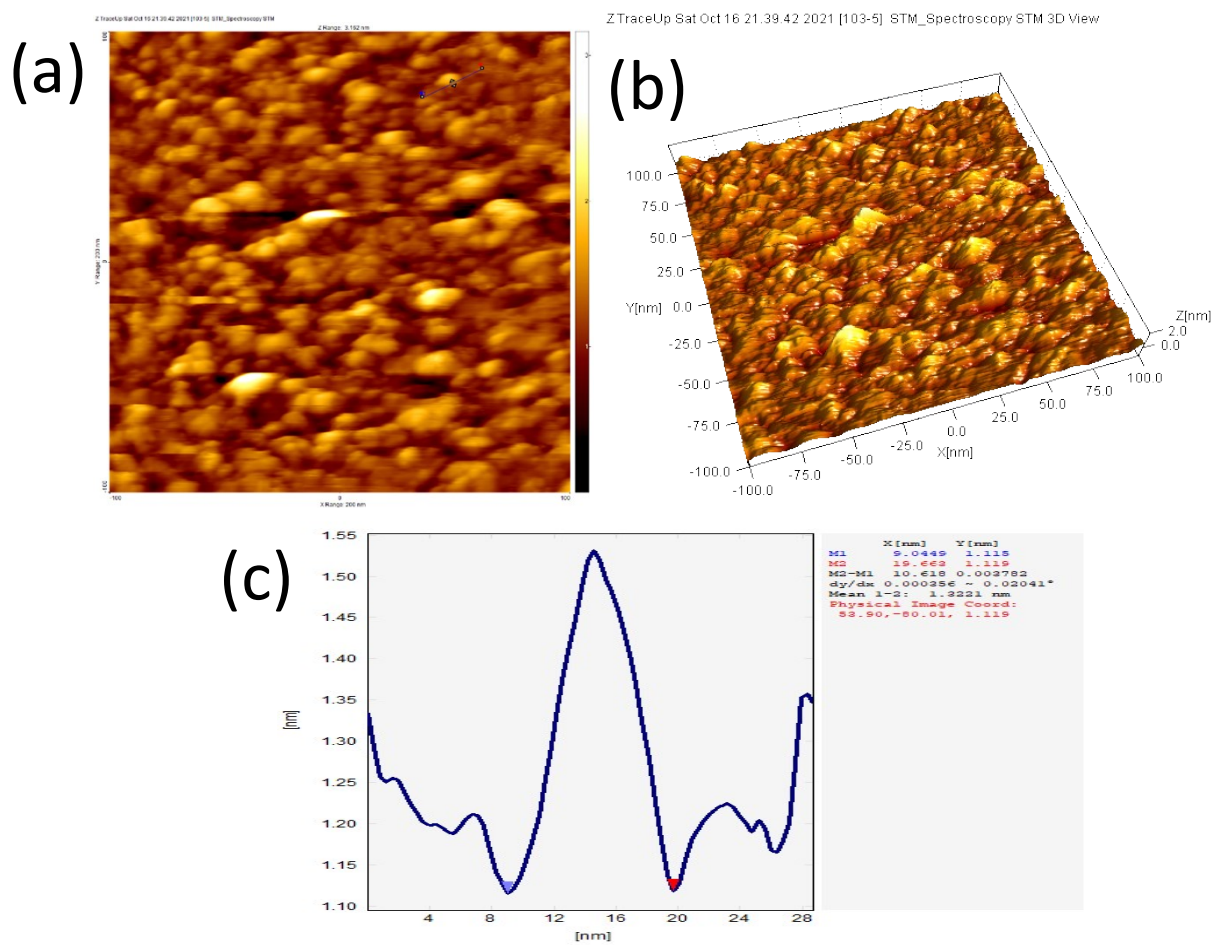

**Figure S3** :( a& b) STM 2D and 3D atomic resolution images; (c) surface profile.



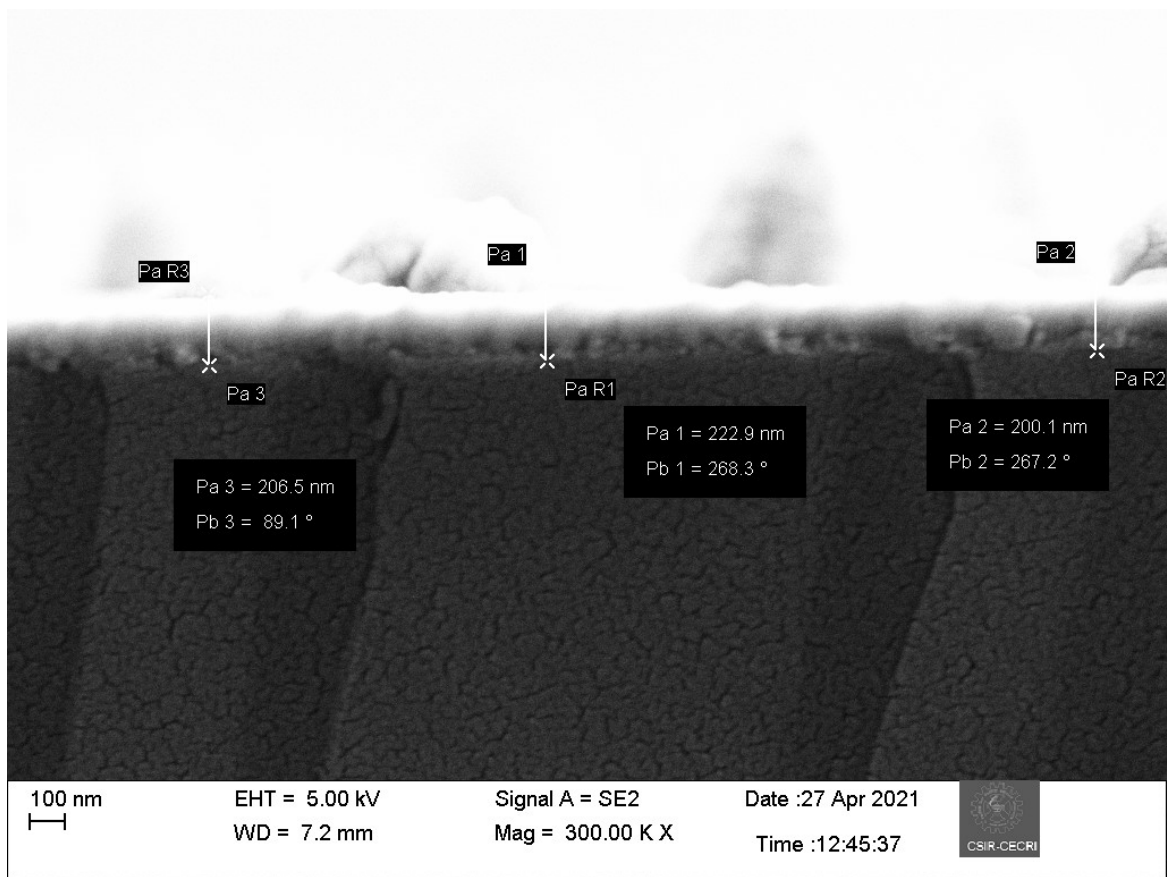

**Figure S4:** FESEM cross sectional image.

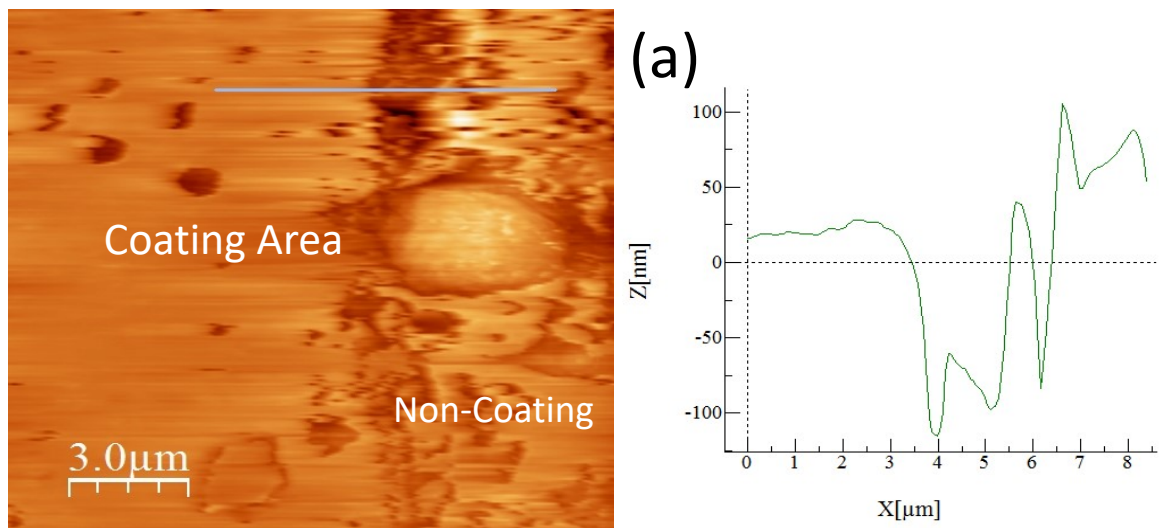

**Figure S5:** (a) AFM 2D topographical images of cross section measurement; (b) Thickness profile.

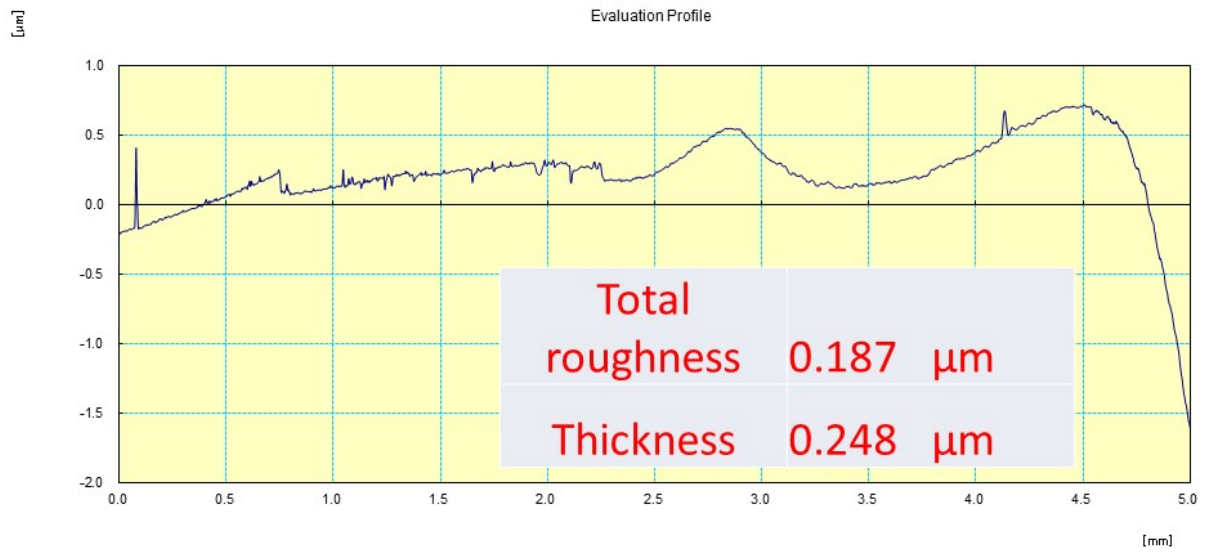

**Figure S6:** Thickness profilometer profile.

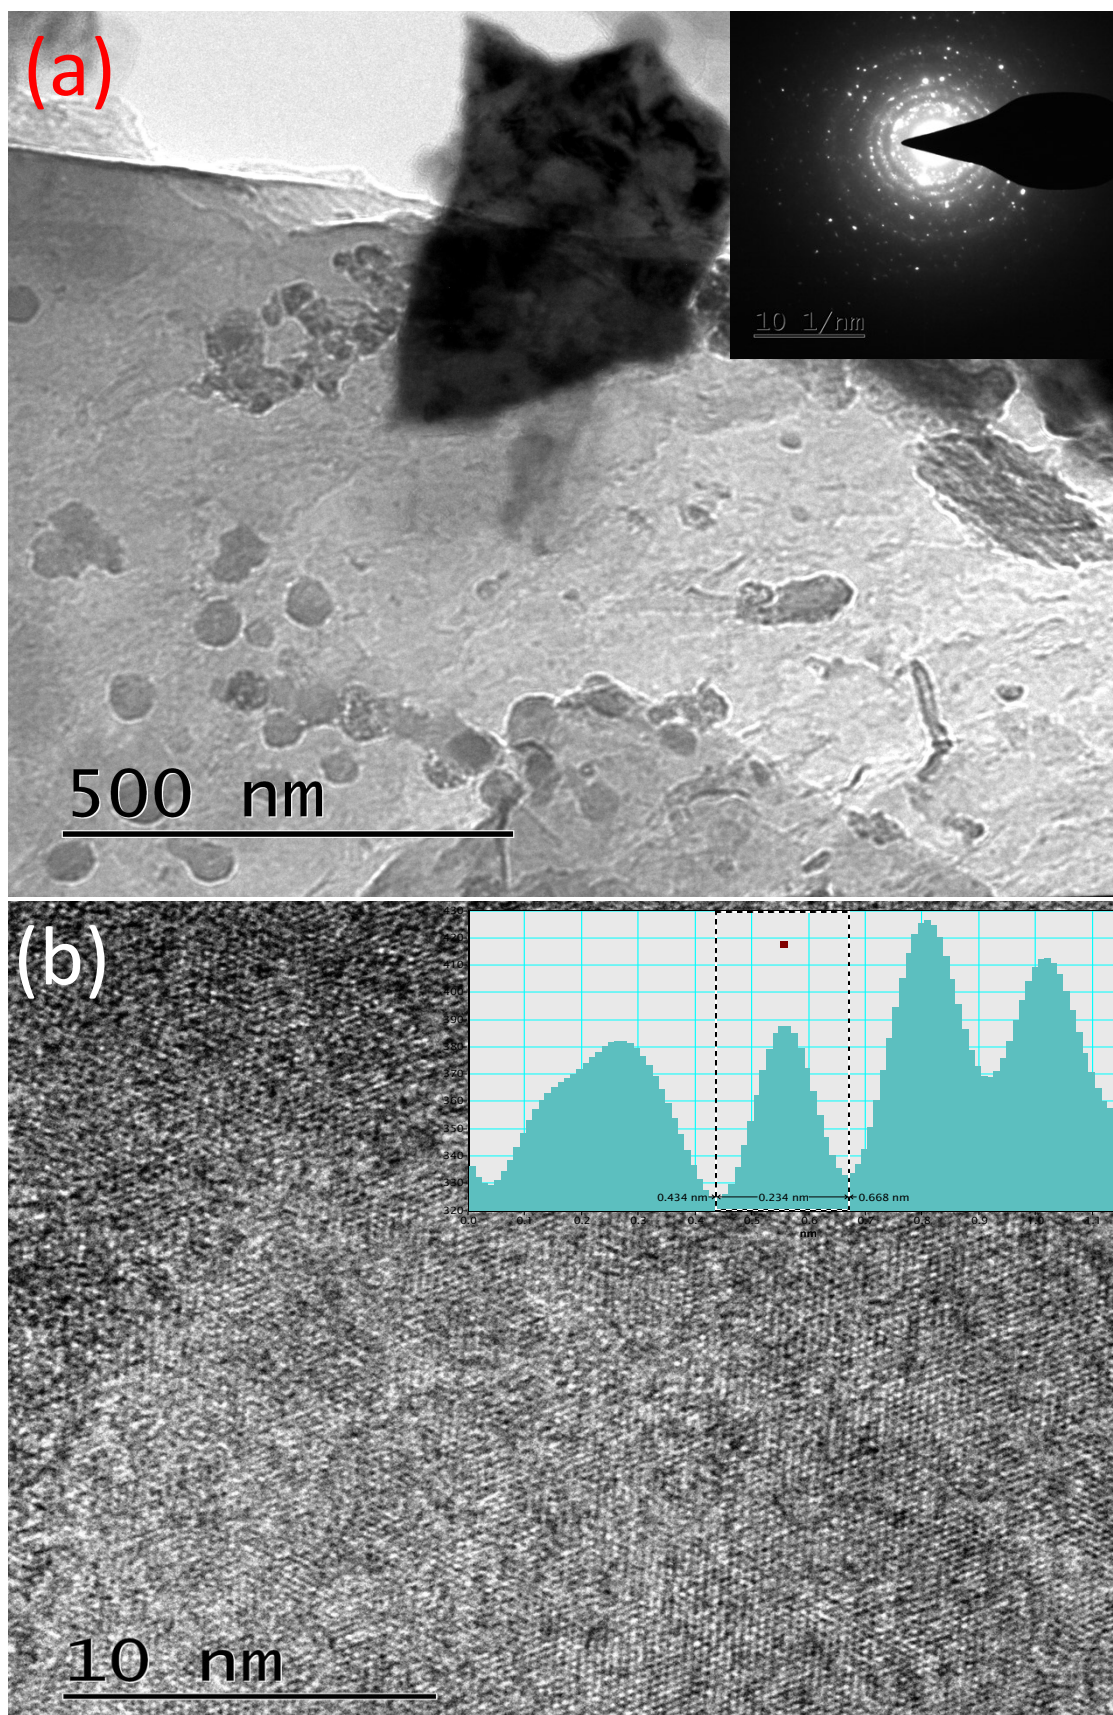

**Figure S7:** (a) TEM morphology of FeS RT (inset: SAED); (b) lattice fringes (inset: d-space profile).



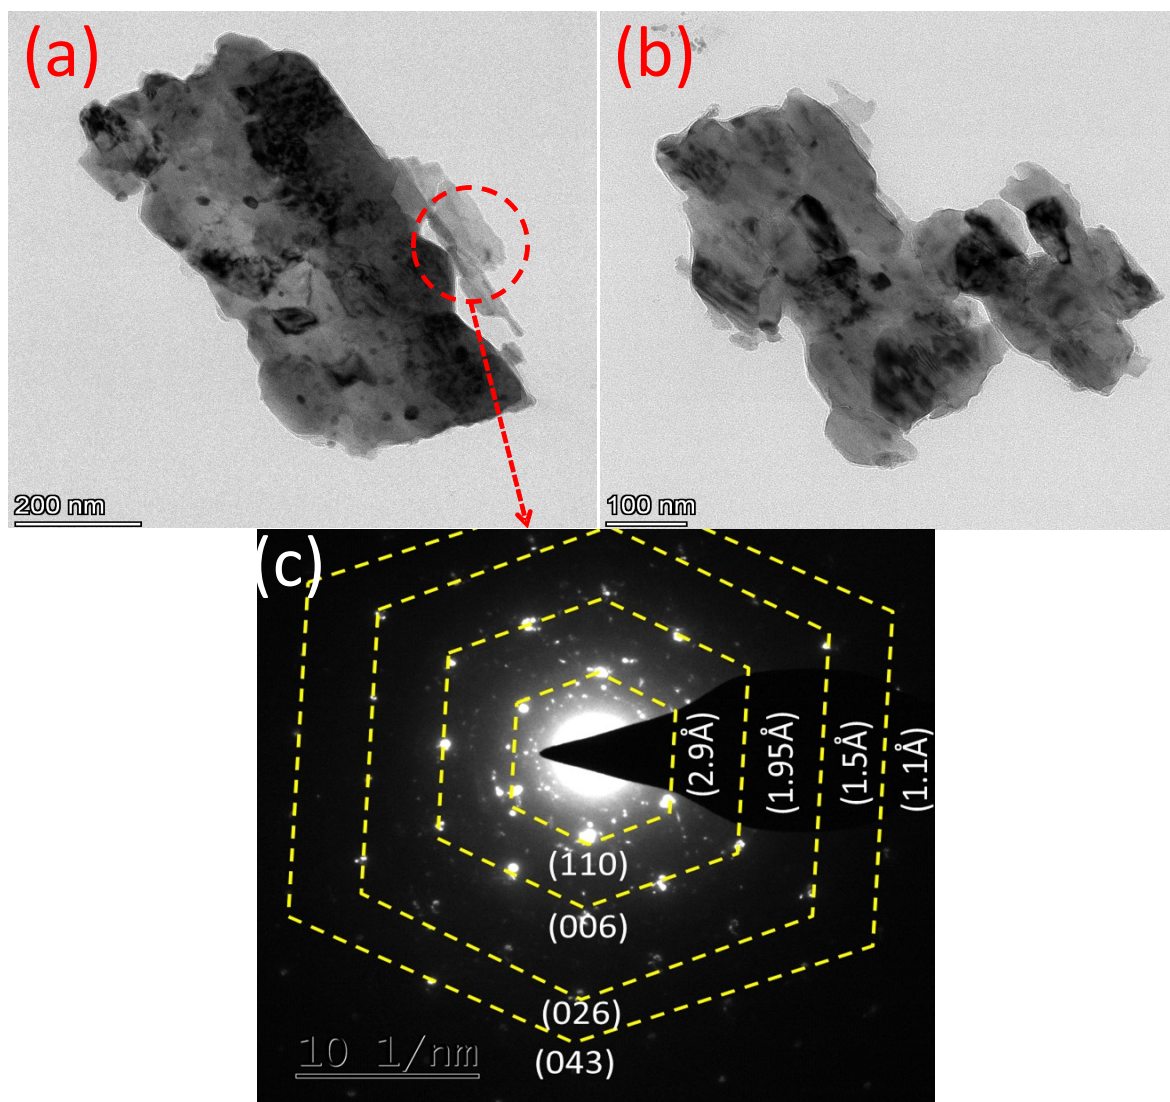

**Figure S8:** (a) Selected SAED area of TEM image of FeS A650 nano particles; (b) TEM image of FeS A650 other selected area; (c) SAED pattern of FeS A650 nano particles.

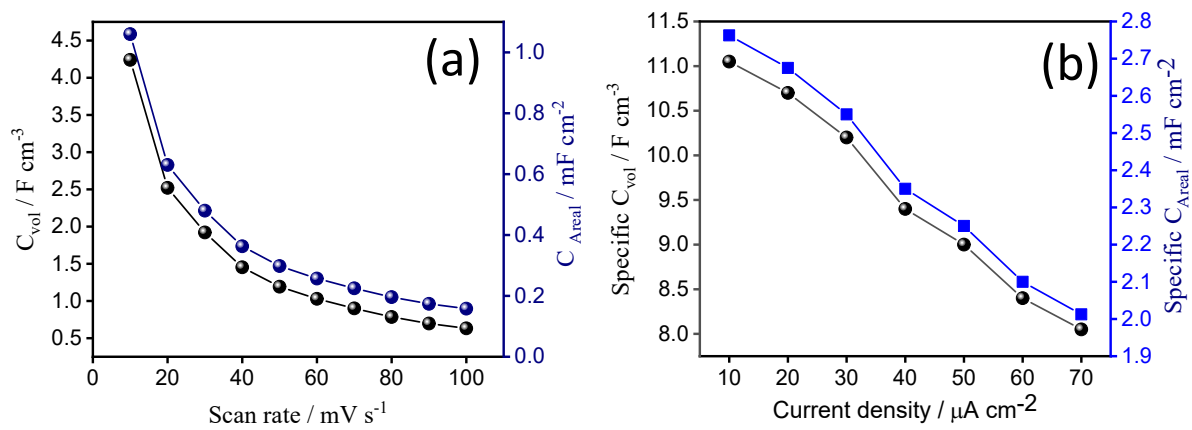



**Figure S9:** (a) Specific areal capacitance & Volumetric capacitance vs sweep rate of FeS thin film electrode RT; (b) Specific discharge areal capacitance & volumetric capacitance vs current rate of FeS thin film electrode RT.

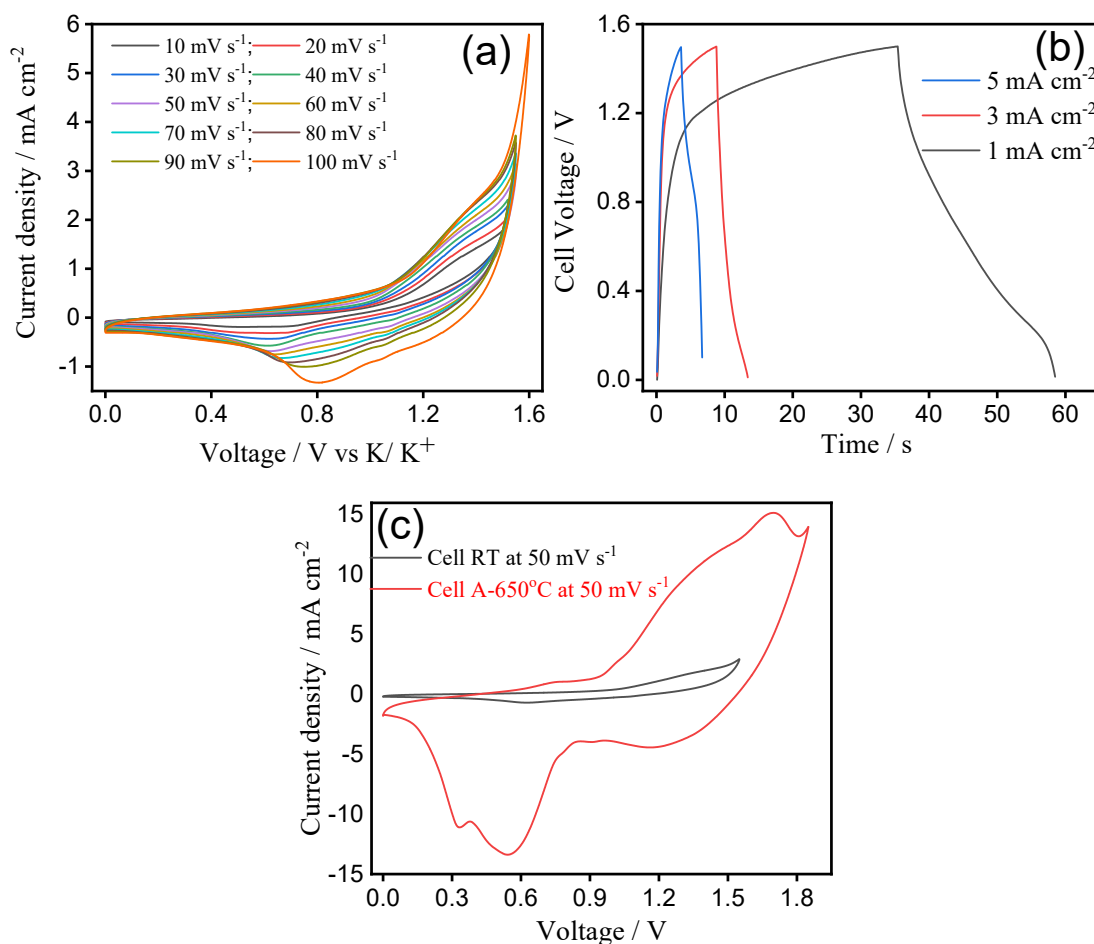

**Figure S10:** Electrochemical analysis of full cell (RT) (a) CV profile of FeS thin film symmetric device (RT) at scan rate of 10 to 100 mV s<sup>-1</sup>; (b) GCD profile of FeS thin film symmetric device (RT) at varying current density range; (c) CV profile comparison for FeS thin film symmetric devices RT and cell-A650 at a scan rate 50 mV s<sup>-1</sup>.

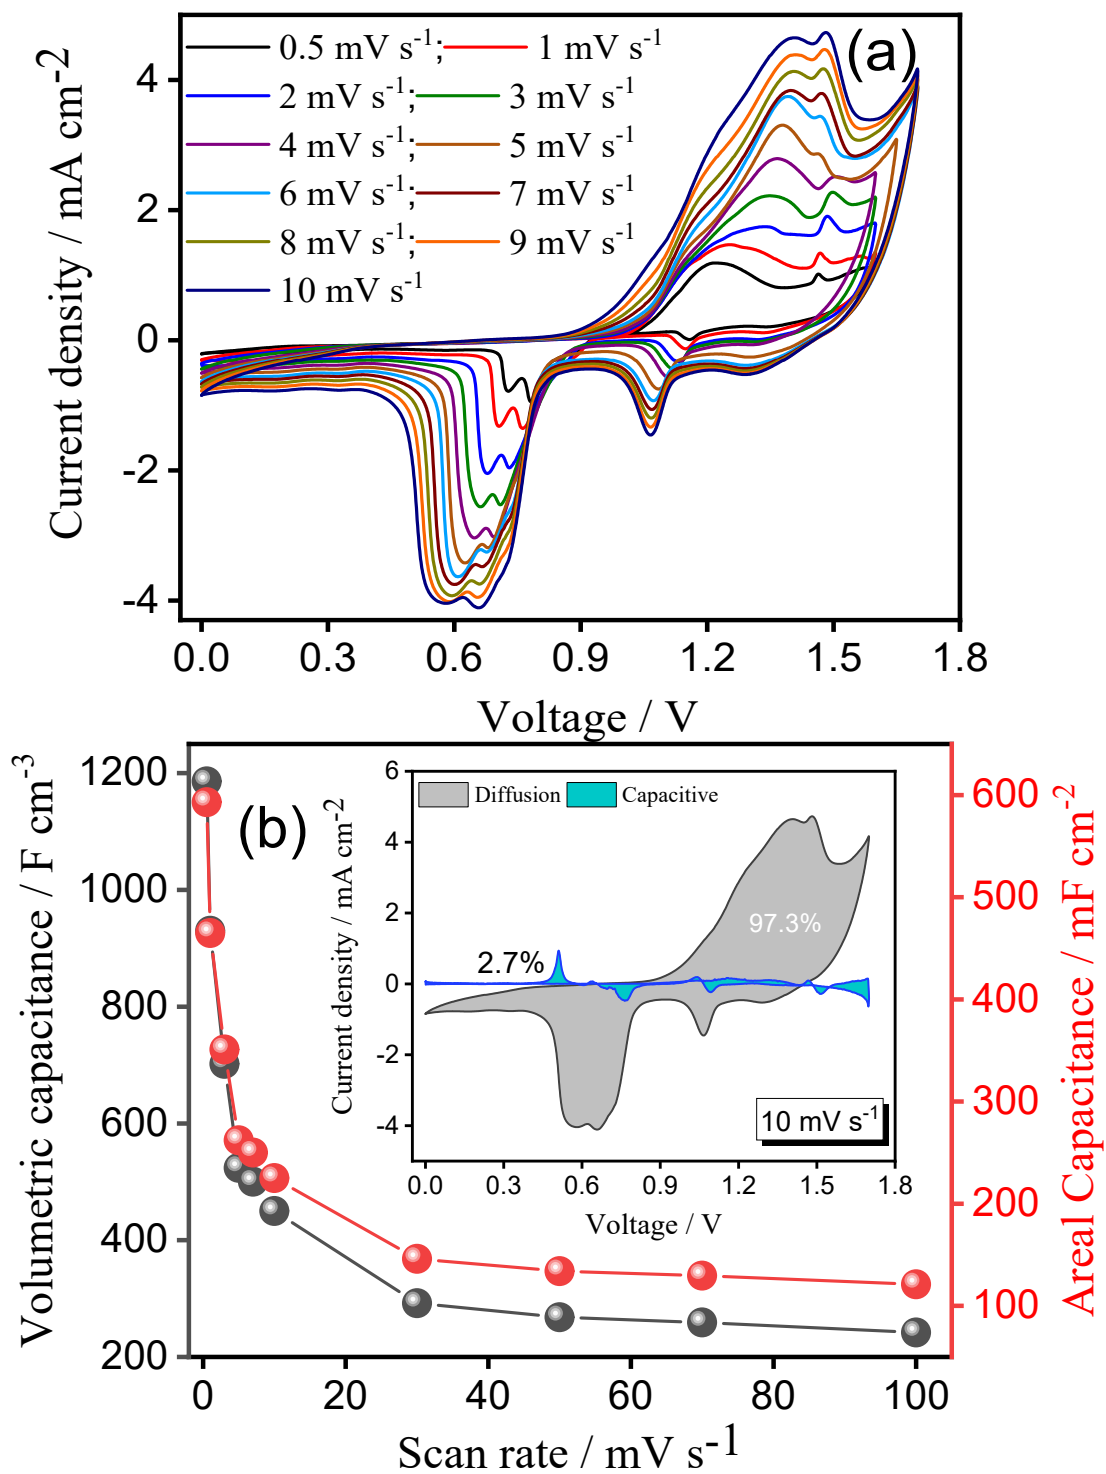

**Figure S11:** (a) CV curve of FeS symmetric device (A650) at low scan rates (0.5 to 10 mVs<sup>-1</sup>); (b) Specific volumetric capacitance and areal capacitance vs scan rate.

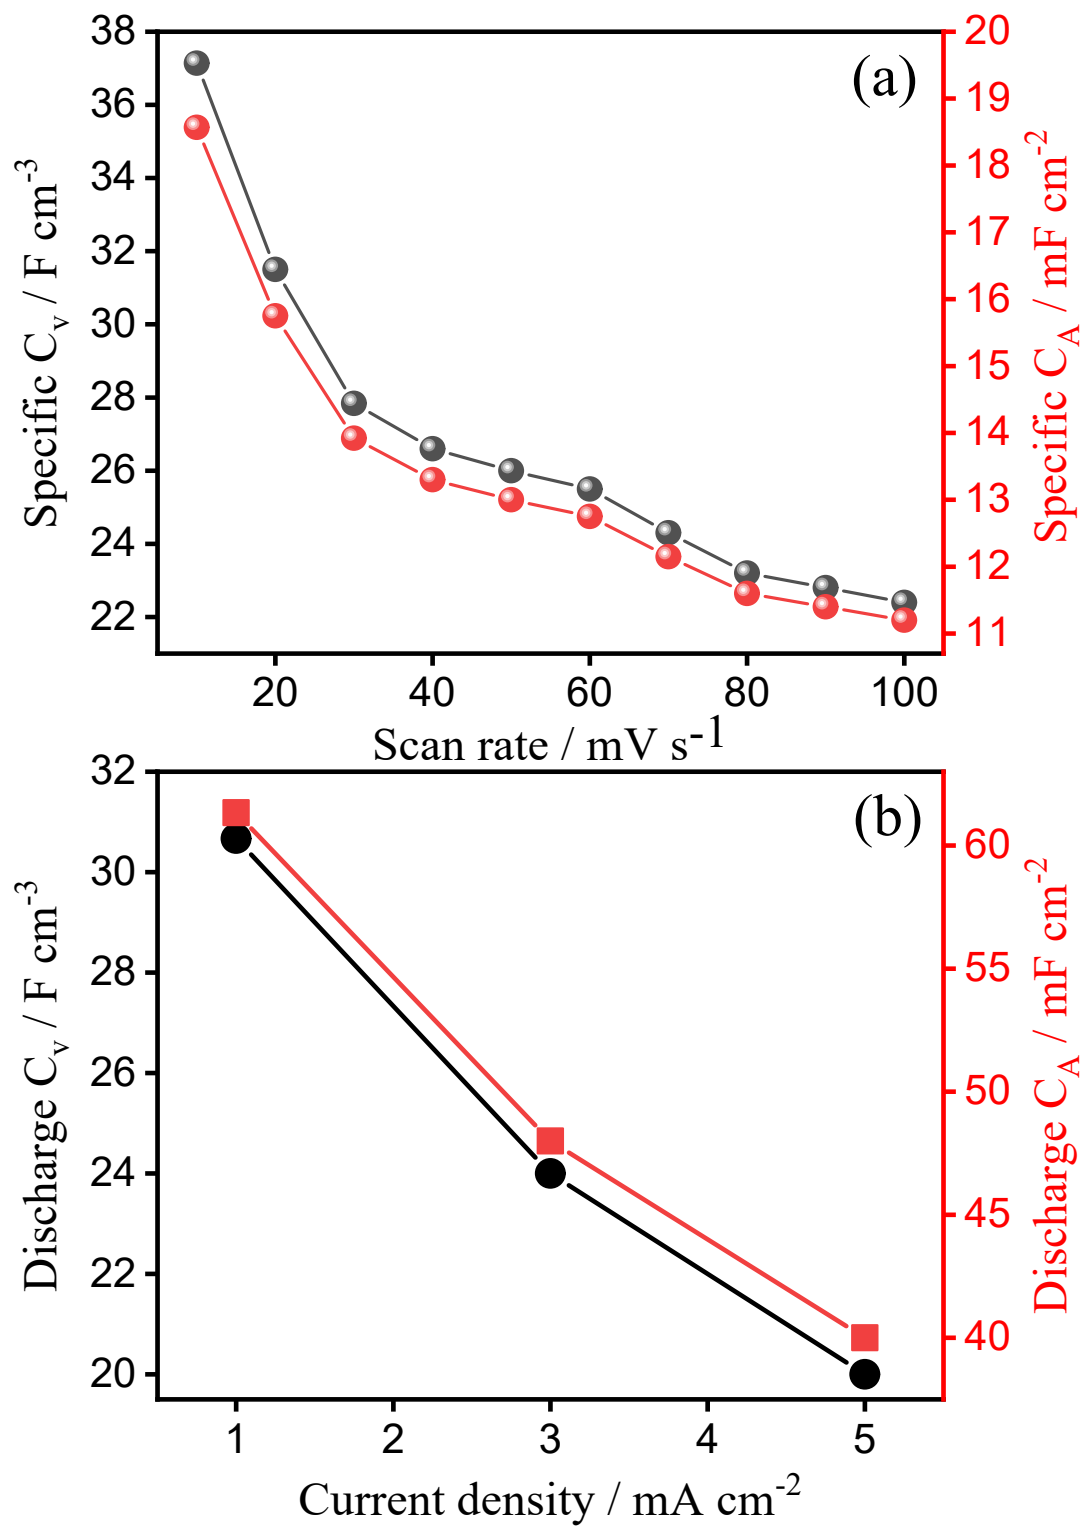

**Figure S12:** Electrochemical characterization of FeS Symmetric device RT (a) Specific volumetric and areal capacitance vs scan rate; (b) Specific volumetric capacitance vs current density.

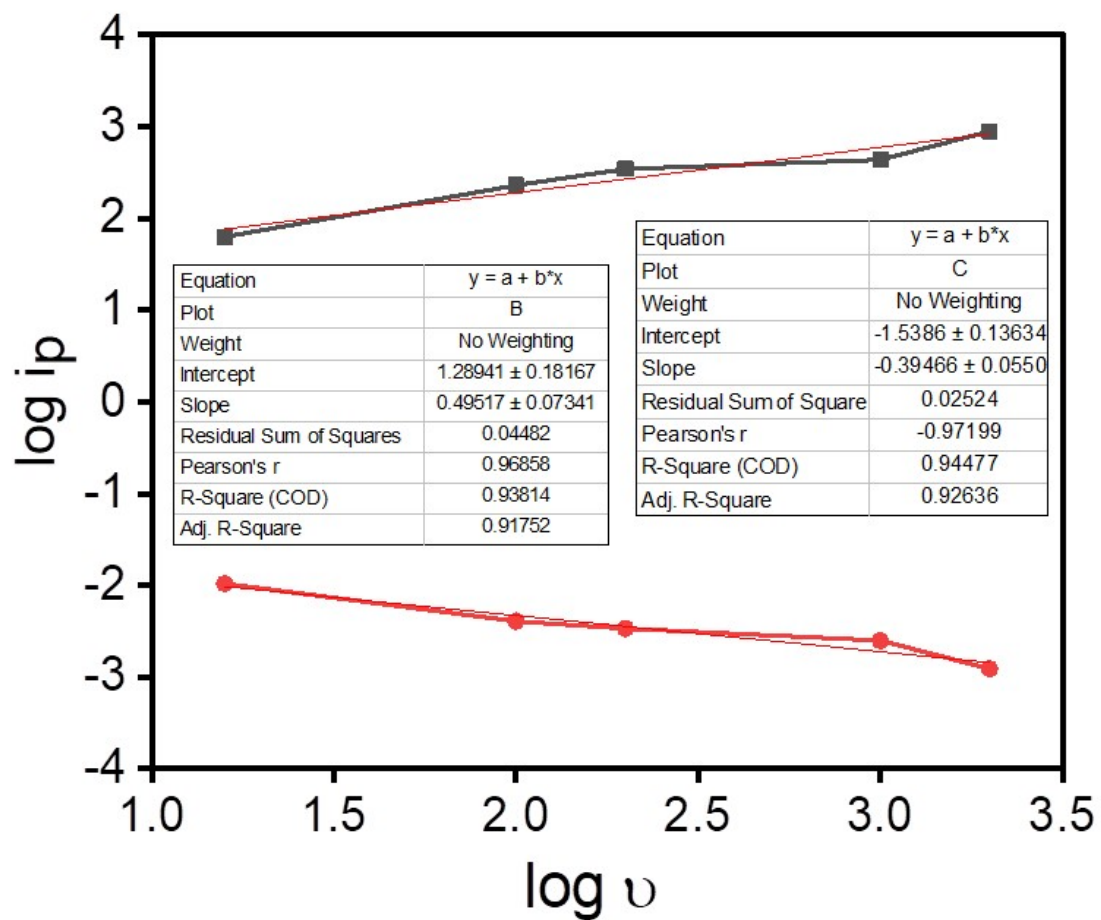

**Figure S13:** Slope (scan rate vs peak current) measurement curve from CV curve of FeS cell A650.



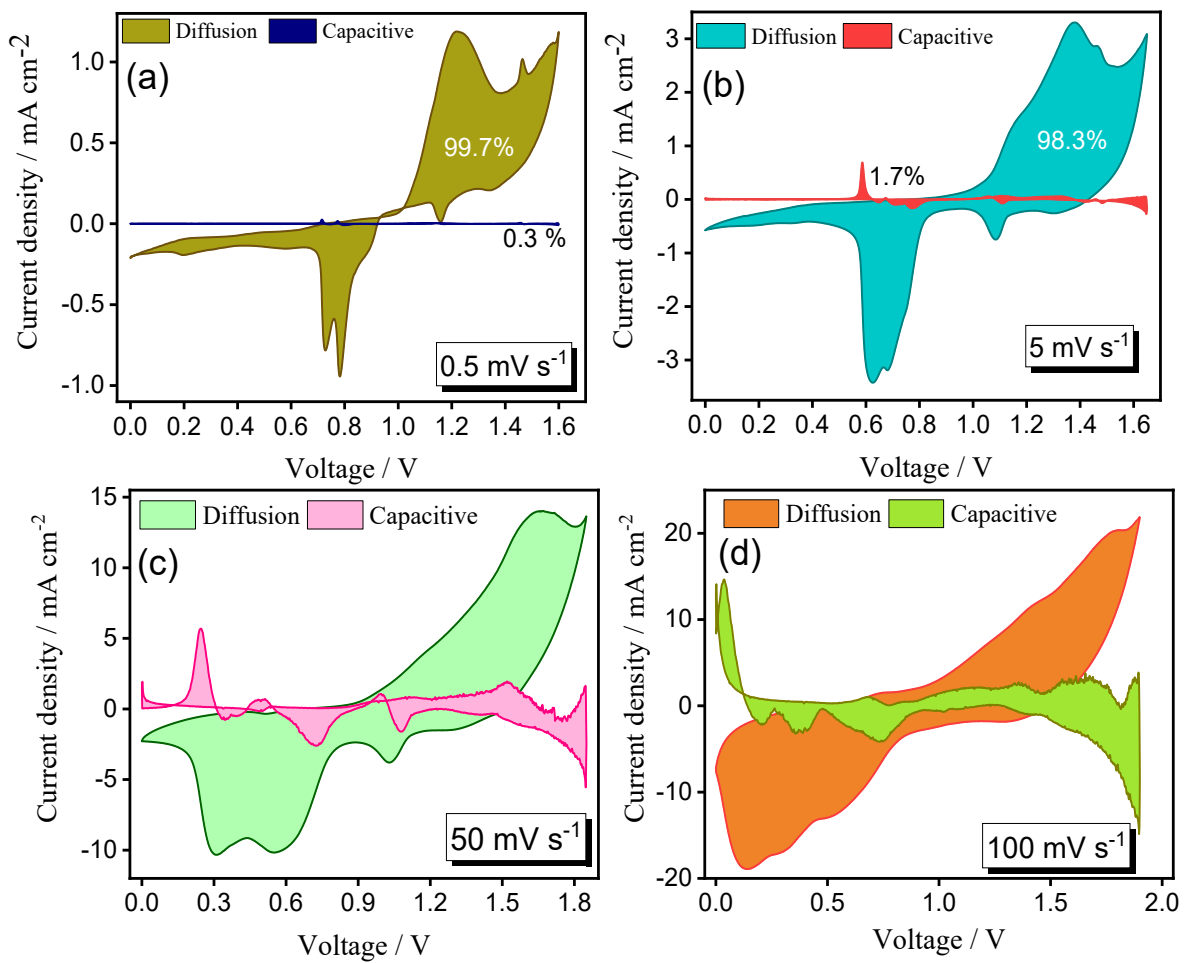

**Figure S14:** (a-d) CV curve comparison of contribution of diffusion and capacitive at 0.5, 5, 50 and 100 mVs<sup>-1</sup>.

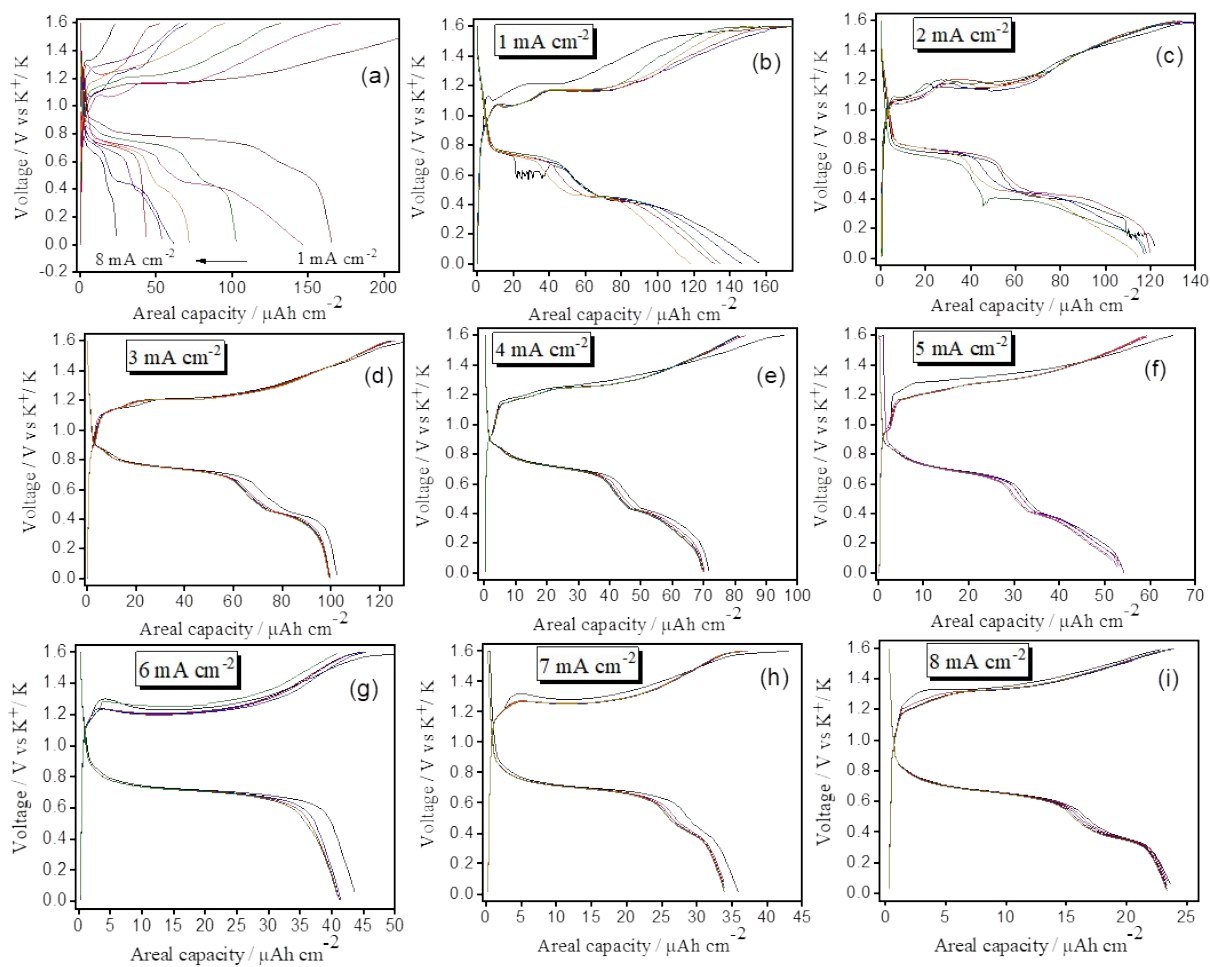

**Figure S15:** (a) Areal capacity profile of FeS (cell A650) device with respect to current density ranges; (b-i) Areal capacity profiles of 5 cycles at current densities from  $1 \text{ mA cm}^{-2}$  to  $8 \text{ mA cm}^{-2}$ .

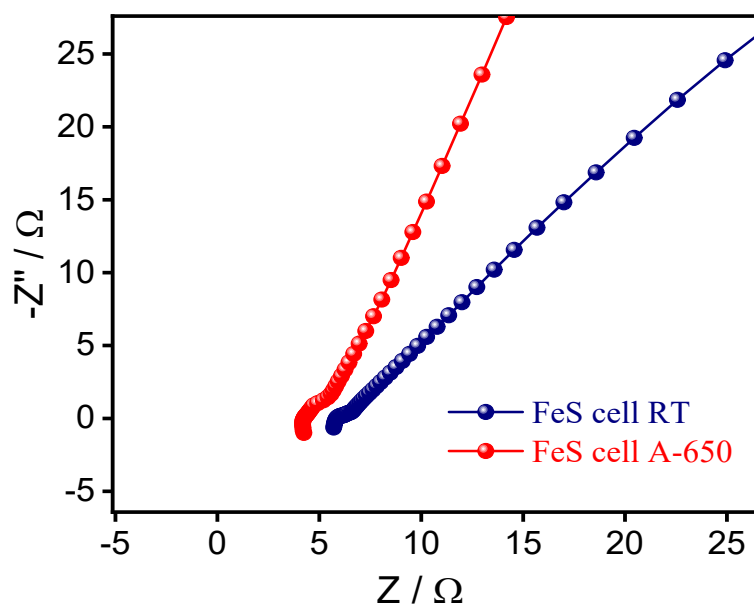

**Figure S16:** EIS comparison of both thin film supercapacitor devices FeS cell RT and Cell A-650.

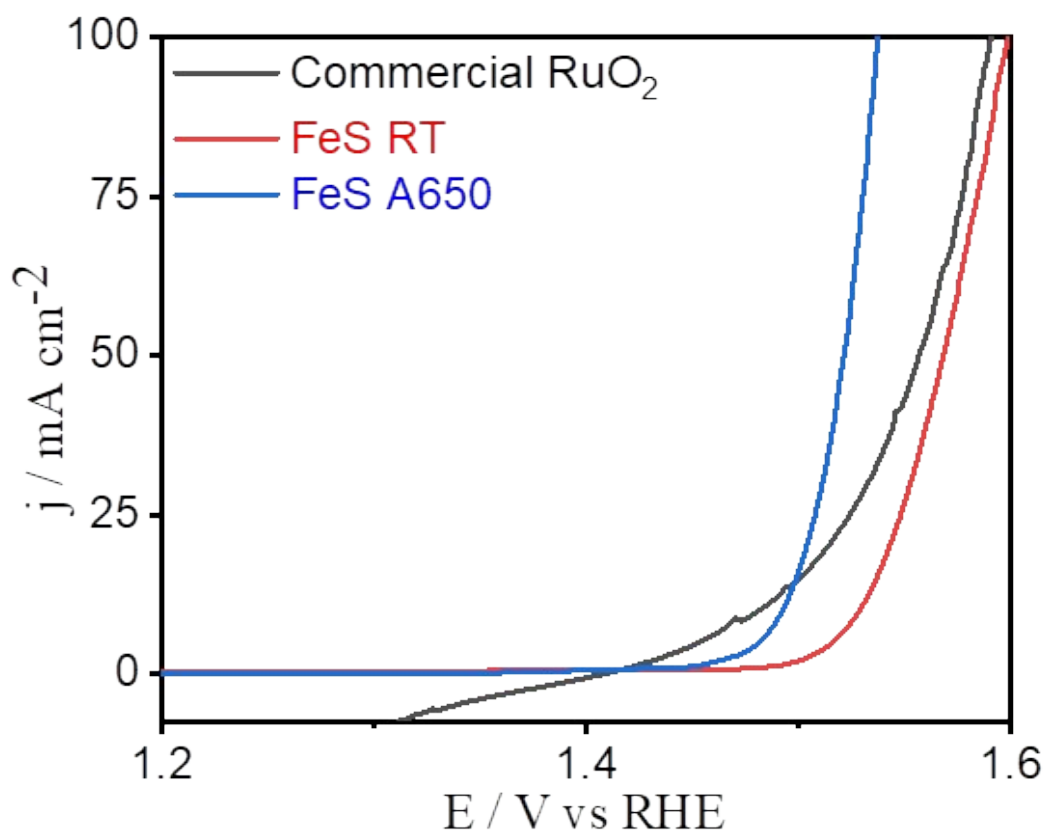

**Figure S17:** (a) LSV comparison of commercial RuO<sub>2</sub>, FeS RT and FeS A650 acquired at 10 mV s<sup>-1</sup> in an alkaline 1 M KOH medium.

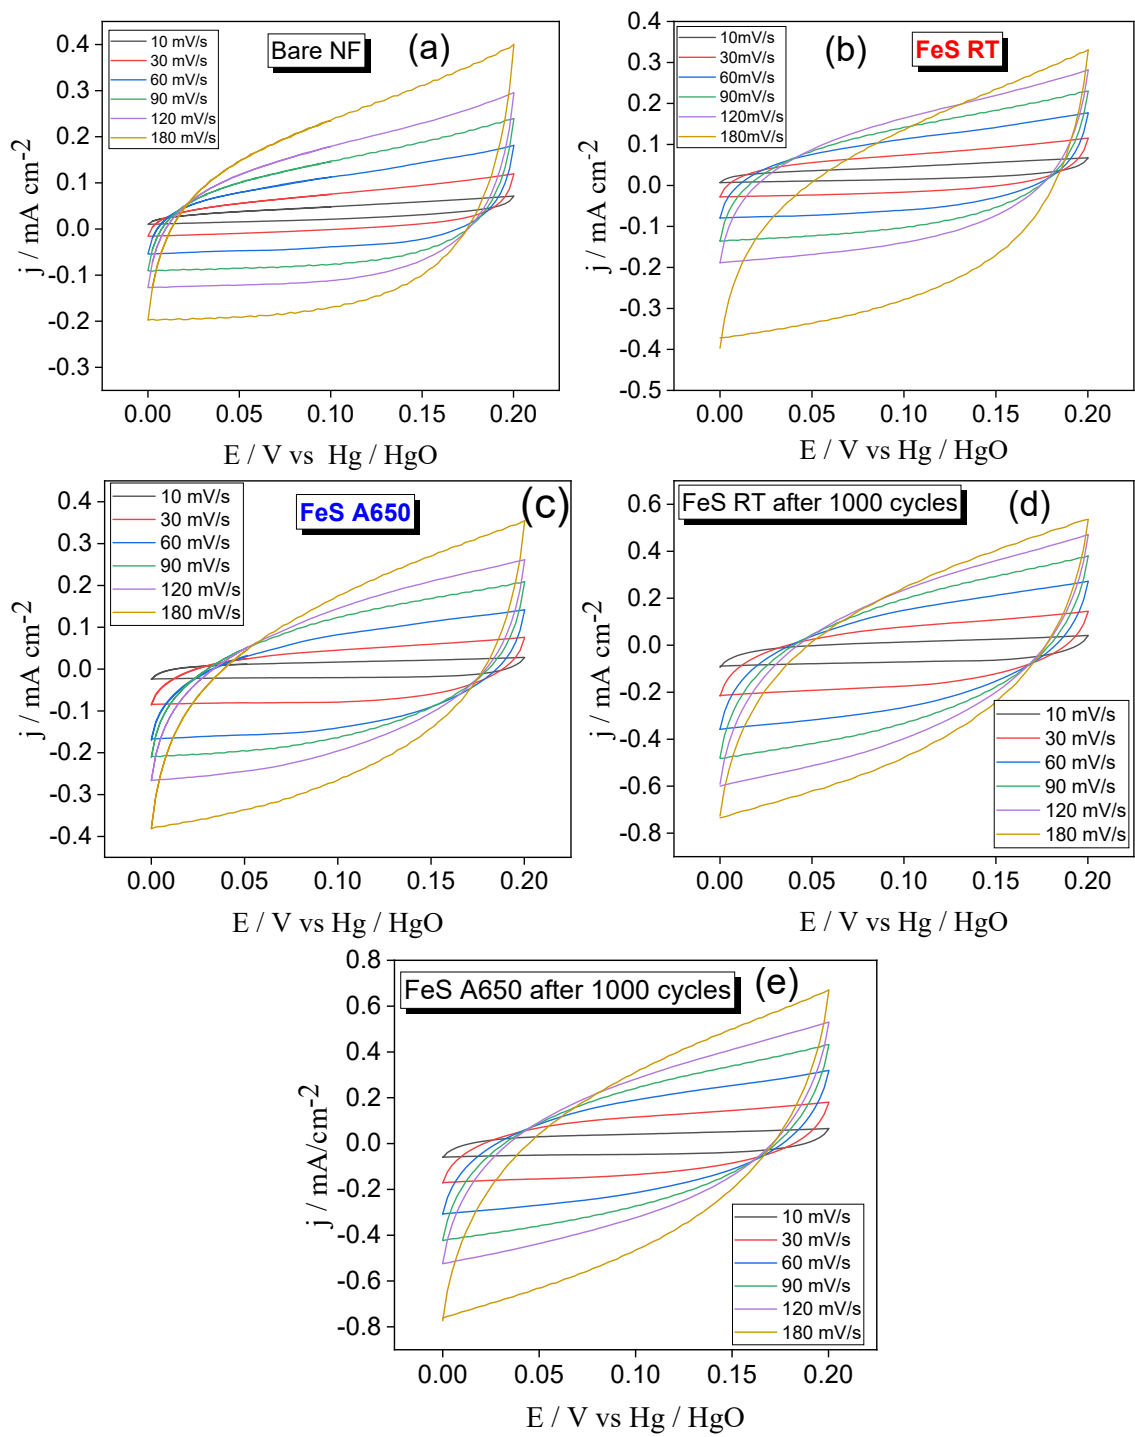

**Figure S18:** CV curves at various scan rates; (a) Bare NF; (b) FeS RT; (c) FeS A650; (d) FeS RT after 1000 cycles; (e) FeS A650 after 1000 cycles.



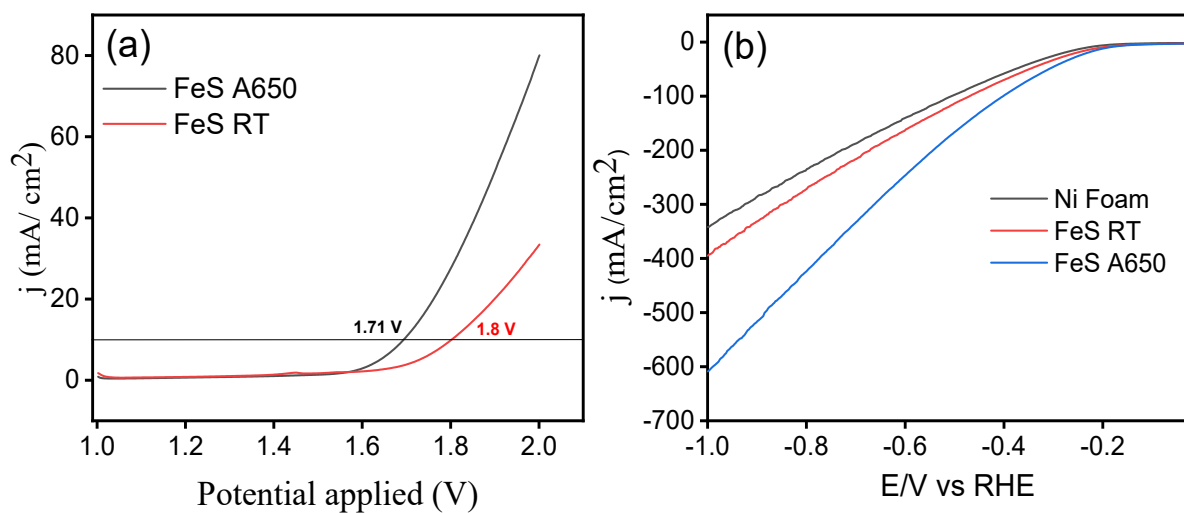

**Figure S19:** (a) LSV of FeS RT and FeS A650 thin film electrode comparison in  $\text{O}_2$  saturated in alkaline 1M KOH medium;(b) LSV curve showing the HER response of bare Ni foam, FeS RT and FeS A650 electrodes in alkaline 1M KOH medium.

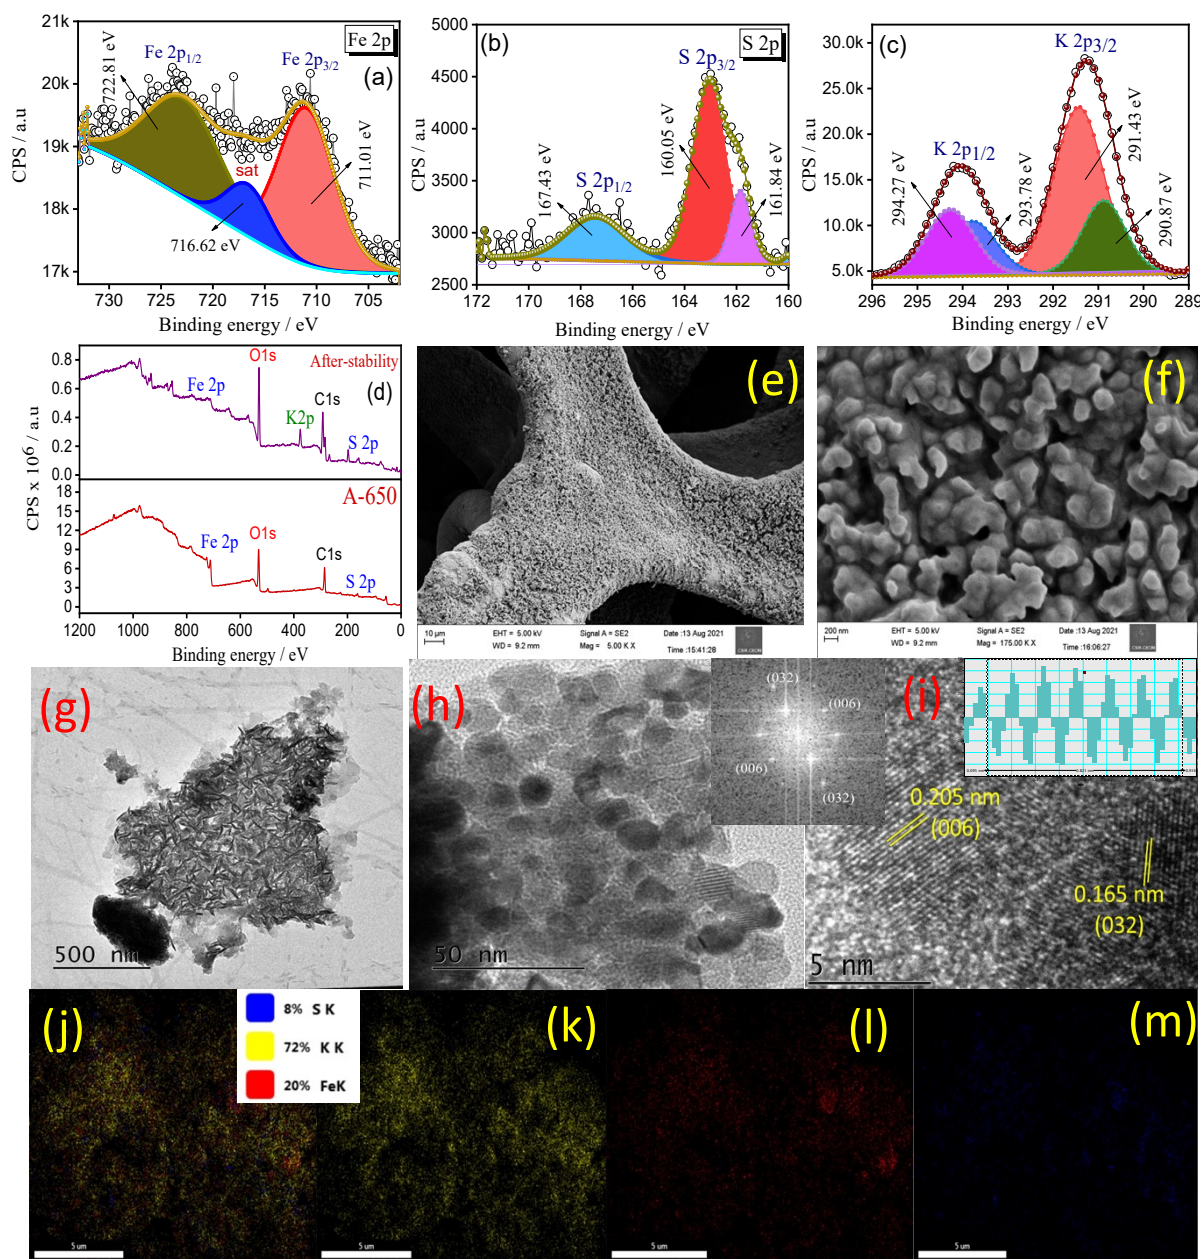

**Figure S20:** Post study analysis(Ex-situ) of FeS (A650) thin film (a) XPS deconvoluted spectra of Fe 2p; (b)XPS deconvoluted spectra of S 2p; (c) K 2p; (d) Survey spectrum comparison of pristine and after stability; (e& f) FESEM morphologies of FeS thin film after stability at 5 KX and 175 KX; (g& h) TEM morphologies (inset: FFT image); (i) d- spacing (inset: d-spacing profile spectrum); (j-l)HRTEM-EDS mapping for F,S and K.

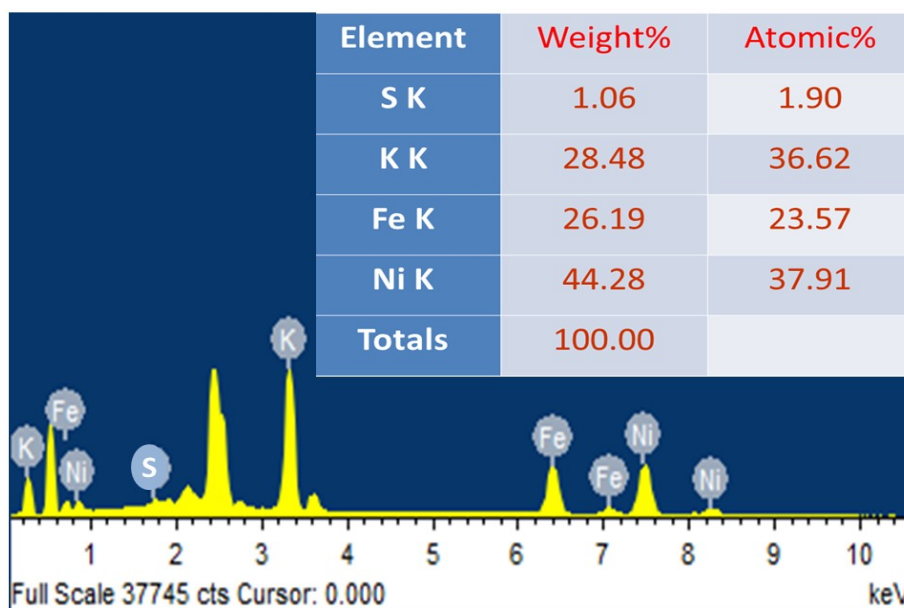

**Figure S21:** EDAX spectrum of FeS (cell A650) electrode after stability analysis.

**Table S1:** The electrochemical stability of the volumetric capacitance comparison study of symmetric supercapacitor based reported literature

| Material & Configuration                            | Method                  | Electrolyte & Voltage window                    | Volumetric capacitance       | Specific Energy density         | Specific Power density       | Stability & Retention | Ref              |
|-----------------------------------------------------|-------------------------|-------------------------------------------------|------------------------------|---------------------------------|------------------------------|-----------------------|------------------|
| SWNT)/nitrogen-doped rGO Symmetric                  | Hydro-thermal synthesis | PVA/H <sub>3</sub> PO <sub>4</sub> 1.0V         | 300 F cm <sup>-3</sup>       | 6.3 mWh cm <sup>-3</sup>        | 1,085 mW cm <sup>-3</sup>    | 10,000 93%            | 20               |
| Co(OH) <sub>2</sub> /rGO Symmetric                  | Hydro-thermal synthesis | PVA/KOH 0–1.4 V                                 | 39 F cm <sup>-3</sup>        | 20 mWh cm <sup>-3</sup>         | 56 mW cm <sup>-3</sup>       | 2000 99.35%           | 21               |
| Co <sub>3</sub> O <sub>4</sub> Symmetric            | E-beam evaporation      | LiPON 2 V,                                      | 37 (±2) F cm <sup>-3</sup>   | 8 (±2) mWh cm <sup>-3</sup>     | 16 (±2) W cm <sup>-3</sup>   | 30000                 | 22               |
| RGO/Ag/Fe <sub>2</sub> O <sub>3</sub> FSS Symmetric | SILAR                   | PVA-LiCl 1.2V                                   | 18.2 F cm <sup>-3</sup>      | 3.65 mWh cm <sup>-3</sup>       | 290.3 mW cm <sup>-3</sup>    | 10000 100%            | 23               |
| MnO <sub>2</sub> /Au NSP Symmetric                  | Anodization             | PVA/H <sub>3</sub> PO <sub>4</sub> 1.0V         | 20.35 F cm <sup>-3</sup>     | 1.75 mWh cm <sup>-3</sup>       | 13.46 W cm <sup>-3</sup>     | 5000 87.5%            | 24               |
| rGO-TiO <sub>2</sub> Symmetric                      | Vacuum filtration       | PVA/KOH 0.8V                                    | 237 F cm <sup>-3</sup>       | 16 mWh cm <sup>-3</sup>         | 1.8 W cm <sup>-3</sup>       | 4000                  | 25               |
| MnO <sub>2</sub> spheres Symmetric                  | Hydro-thermal synthesis | PVA-BMIMCl-Li <sub>2</sub> SO <sub>4</sub> 1.5V | 81 F cm <sup>-3</sup>        | 6.6 mWh cm <sup>-3</sup>        | 549 mW cm <sup>-3</sup>      | 6000 91.5%            | 26               |
| <b>FeS Symmetry</b>                                 | <b>PLD</b>              | <b>PVA-KOH 1.6 V</b>                            | <b>841 F cm<sup>-3</sup></b> | <b>14.95 mWh cm<sup>3</sup></b> | <b>6.4 W cm<sup>-3</sup></b> | <b>14000 90%</b>      | <b>This work</b> |

**Table S2:** The electrochemical stability of the areal capacitance comparison study of symmetric supercapacitor based reported literature

| <b>Materials&amp; Configuration</b>         | <b>Method</b>                      | <b>Voltage window &amp; Electrolyte</b>                     | <b>Specific capacitance (Areal)</b> | <b>Stability</b>     | <b>Ref</b>       |
|---------------------------------------------|------------------------------------|-------------------------------------------------------------|-------------------------------------|----------------------|------------------|
| CrN<br>Symmetric                            | DC magnetron sputtering            | 0.5 M H <sub>2</sub> SO <sub>4</sub><br>0.8V                | 12.8<br>mF cm <sup>-2</sup>         | 20 000<br>92.1%      | 27               |
| V <sub>2</sub> O <sub>5</sub><br>Symmetric  | Thermal Evaporation                | PVA-KOH<br>1.0V                                             | 9.7<br>mF cm <sup>-2</sup>          | 30000<br>95%         | 28               |
| VN<br>Symmetric                             | Chemical Solution Deposition (CSD) | 1 M KOH<br>0.8 V                                            | 60<br>mF cm <sup>-2</sup>           | 15,000<br>91.2%      | 29               |
| Ni(OH) <sub>2</sub><br>Symmetric            | Electro-deposition                 | 6 M KOH<br>0.4V                                             | 235<br>mF cm <sup>-2</sup>          | 20,000<br>-----      | 30               |
| KF@PPy/ <i>f</i> -CNT<br>Symmetric          | Synthesis                          | PVA/H <sub>2</sub> SO <sub>4</sub><br>- 0.2 to +0.8 V       | 258<br>mF cm <sup>-2</sup>          | 2500<br>97.4%        | 31               |
| FeOOH@MnO <sub>2</sub><br>Symmetric         | Hydro-thermal Synthesis            | PVA-LiClO <sub>4</sub><br>1.0V                              | 252<br>mF cm <sup>-2</sup>          | 2000<br>99.5%        | 32               |
| MoO <sub>3</sub> /GO/MWCNTs<br>Symmetric    | Electro-deposition                 | PVA/H <sub>3</sub> PO <sub>4</sub><br>2.5 V                 | 103<br>mF cm <sup>-2</sup>          | 2000<br>86.8%        | 33               |
| PPy:PSS<br>Symmetric                        | Co-precipitation method            | 1 M KOH<br>0 to 1.0 V                                       | 175.3<br>mF cm <sup>-2</sup>        | 5000<br>86.3%        | 34               |
| V <sub>2</sub> O <sub>5</sub><br>Symmetric  | sol-gel                            | BMIMBF <sub>4</sub> -<br>LiClO <sub>4</sub><br>2.0 to 2.0 V | 310<br>mF cm <sup>-2</sup>          | 2000<br>65%          | 35               |
| MnO <sub>2</sub> /CNT<br>Symmetric          | Spinning method                    | CMC-LiClO <sub>4</sub><br>1.2V                              | 135<br>mF cm <sup>-2</sup>          | 10,000<br>86%        | 36               |
| Fe <sub>2</sub> O <sub>3</sub><br>Symmetric | Synthesis                          | PVA/PAAS/KOH<br>H<br>1.2 V                                  | 3.3<br>mF cm <sup>-2</sup>          | 5000<br>85.6%        | 37               |
| <b>FeS<br/>Symmetric</b>                    | <b>PLD</b>                         | <b>PVA-KOH<br/>1.6V</b>                                     | <b>420.6<br/>mF cm<sup>-2</sup></b> | <b>14000<br/>90%</b> | <b>This work</b> |



**Table S3:** State of art of the thin film based electro catalytic materials and their OER performance characteristics with other reported literature

| Catalyst                                              | Synthesis Method                           | Medium        | Overpotential @ 10mA cm <sup>-2</sup> | Tafel (mV/dec) | Substrate                   | Ref.             |
|-------------------------------------------------------|--------------------------------------------|---------------|---------------------------------------|----------------|-----------------------------|------------------|
| A-MnS                                                 | Hydrothermal and Anion Exchange            | 1 M KOH       | 292 mV                                | 70             | Stainless Steel             | 38               |
| NiSe <sub>2</sub> @MoS <sub>2</sub>                   | Electrodeposition and Hydrothermal         | 1 M KOH       | 267 mV                                | 85             | Carbon Fiber Paper          | 39               |
| MoS <sub>2</sub>                                      | Atomic layer Deposition                    | 1 M KOH       | 273mV                                 | 61             | Carbon Fiber Paper          | 40               |
| Ni <sub>0.88</sub> Co <sub>1.22</sub> Se <sub>4</sub> | Two step reflux method                     | 1 M KOH       | 320mV                                 | 78             | FTO                         | 41               |
| NiS                                                   | Hot Injection Method                       | 1 M KOH       | 300mV                                 | ---            | Ni Foam                     | 42               |
| NiS@Ni Foam                                           | Aerosol assisted Chemical Vapor Deposition | 1 M KOH       | 300mV                                 | 81.3           | Ni Foam                     | 43               |
| Co <sub>9</sub> S <sub>8</sub> Holoow Sphere          | Solvothermal                               | 1 M KOH       | 285mV                                 | 58             | Glassy Carbon               | 44               |
| Ni <sub>x</sub> Co <sub>3-x</sub> S <sub>4</sub>      | Hot Injection Method                       | 1 M KOH       | 327mV                                 | 89             | Ni Foam                     | 45               |
| NiFeCo-S/C                                            | Wet chemical and Annealing                 | 1 M KOH       | 271mV                                 | 45.4           | Rotating Disk Glassy carbon | 46               |
| Metallic Ni <sub>2</sub> S <sub>3</sub> film          | Atomic Layer Deposition                    | 1 M KOH       | 400mV                                 | 51             | Au on Si/SiO <sub>2</sub>   | 47               |
| CoFe/(OH) <sub>x</sub>                                | SILAR                                      | 1 M KOH       | 275mV                                 | 34             | Copper                      | 48               |
| CoS                                                   | Hydrothermal                               | 1 M KOH       | 383mV                                 | 38             | Glassy Carbon               | 49               |
| <b>FeS</b>                                            | <b>PLD</b>                                 | <b>1M KOH</b> | <b>263mV</b>                          | <b>48</b>      | <b>Ni Foam</b>              | <b>This Work</b> |

**References:**

- [1] Y. W. Lee, B. S. Kim, J. Hong, H. Choi, H. S. Jang, B. Hou, S. Pak, J. Lee, S. H. Lee, S. M. Morris, D. Whang, J. P. Hong, H. S. Shin, S. N. Cha, J. I. Sohn, J. M. Kim, *Nano Energy* **2017**, *37*, 15.
- [2] T. M. Higgins, S. Finn, M. Matthiesen, S. Grieger, K. Synnatschke, M. Brohmann, M. Rother, C. Backes, J. Zaumseil, *Adv. Funct. Mater.* **2019**, *29*, DOI 10.1002/adfm.201804387.
- [3] N. Li, T. Lv, Y. Yao, H. Li, K. Liu, T. Chen, *J. Mater. Chem. A* **2017**, *5*, 3267.
- [4] D. Ranjith Kumar, S. Kesavan, M. L. Baynosa, J. J. Shim, *Appl. Surf. Sci.* **2018**, *448*, 547.
- [5] G. Yilmaz, X. Lu, *ChemNanoMat* **2016**, *2*, 719.
- [6] C. Yang, N. Hu, W. Wang, B. Cao, *J. Power Sources* **2018**, *399*, 115.
- [7] P. Yu, X. Zhao, Z. Huang, Y. Li, Q. Zhang, *J. Mater. Chem. A* **2014**, *2*, 14413.
- [8] M. Yao, Y. Chen, Z. Wang, C. Shao, J. Dong, Q. Zhang, L. Zhang, X. Zhao, *Chem. Eng. J.* **2020**, *395*, 124057.
- [9] C. Yang, L. Zhang, N. Hu, Z. Yang, Y. Su, S. Xu, M. Li, L. Yao, M. Hong, Y. Zhang, *Chem. Eng. J.* **2017**, *309*, 89.
- [10] L. Yao, C. Zhou, N. Hu, J. Hu, M. Hong, L. Zhang, Y. Zhang, *Appl. Surf.*

- Sci.* **2018**, 435, 699.
- [11] P. Apelgren, M. Amoroso, K. Säljö, M. Montelius, A. Lindahl, L. Stridh Orrhult, , *Mater. Today Proc.* **2019**, 27, 0.
- [12] H. Han, J. S. Lee, S. Cho, *Polymers (Basel)*. **2019**, 11, 3.
- [13] Y. Tian, C. Yang, W. Que, X. Liu, X. Yin, L. B. Kong, *J. Power Sources* **2017**, 359, 332.
- [14] Y. Bu, M. Cao, Y. Jiang, L. Gao, Z. Shi, X. Xiao, M. Wang, G. Yang, Y. Zhou, Y. Shen, *Electrochim. Acta* **2018**, 271, 624.
- [15] X. Wang, H. Huang, F. Zhou, P. Das, P. Wen, S. Zheng, P. Lu, Y. Yu, Z. S. Wu, *Nano Energy* **2021**, 82, 105688.
- [16] M. A. Spencer, O. Yildiz, I. Kamboj, P. D. Bradford, V. Augustyn, *Energy and Fuels* **2021**, 35, 16183.
- [17] X. Li, T. Gao, Q. Liu, Y. Xu, J. Li, D. Xiao, *Mater. Chem. Front.* **2021**, 5, 3636.
- [18] J. K. Kim, J. Scheers, H. S. Ryu, J. H. Ahn, T. H. Nam, K. W. Kim, H. J. Ahn, G. B. Cho, P. Jacobsson, *J. Mater. Chem. A* **2014**, 2, 1774.
- [19] K. Song, X. Wang, J. Wang, B. Zhang, C. Zuo, *ChemElectroChem* **2018**, 5, 1297.
- [20] D. Yu, K. Goh, H. Wang, L. Wei, W. Jiang, Q. Zhang, L. Dai, Y. Chen,

- Nat. Nanotechnol.* **2014**, *9*, 555.
- [21] Y. Rong, Y. Chen, J. Zheng, Y. Zhao, Q. Li, *J. Colloid Interface Sci.* **2021**, *598*,
- [22] T. Göhlert, P. F. Siles, T. Päßler, R. Sommer, S. Baunack, S. Oswald, O. G. Schmidt, *Nano Energy* **2017**, *33*, 387.
- [23] Z. Zou, W. Xiao, Y. Zhang, H. Yu, W. Zhou, *Appl. Surf. Sci.* **2020**, *500*, 144244.
- [24] Y. Gao, H. Jin, Q. Lin, X. Li, M. M. Tavakoli, S. F. Leung, W. M. Tang, L. Zhou, H. L. Wa Chan, Z. Fan, *J. Mater. Chem. A* **2015**, *3*, 10199.
- [25] J. Du, C. Zheng, W. Lv, Y. Deng, Z. Pan, F. Kang, Q. H. Yang, *Adv. Mater. Interfaces* **2017**, *4*, 1.
- [26] J. Zhi, O. Reiser, Y. Wang, A. Hu, *Nanoscale* **2016**, *8*, 11976.
- [27] B. Wei, H. Liang, D. Zhang, Z. Wu, Z. Qi, Z. Wang, *J. Mater. Chem. A* **2017**, *5*, 2844.
- [28] R. Velmurugan, J. Premkumar, R. Pitchai, M. Ulaganathan, B. Subramanian, *ACS Sustain. Chem. Eng.* **2019**, *7*, 13115.
- [29] Z. Q. Wu, B. B. Yang, H. Li, H. Y. Tong, X. Wang, C. D. Li, L. L. Zhu, R. H. Wei, L. Hu, C. H. Liang, X. B. Zhu, Y. P. Sun, *J. Power Sources* **2021**, *507*, DOI 10.1016/j.jpowsour.2021.230269.

- [30] A. Pimsawat, A. Tangtrakarn, N. Pimsawat, S. Daengsakul, *Sci. Rep.* **2019**, *9*, 1.
- [31] J. P. Jyothibas, R. H. Lee, *Polymers (Basel)*. **2018**, *10*, 6.
- [32] R. B. Pujari, S. J. Patil, J. Park, A. Shanmugasundaram, D. W. Lee, *J. Power Sources* **2019**, *436*, 226826.
- [33] M. Faraji, A. Abedini, *Int. J. Hydrogen Energy* **2019**, *44*, 2741.
- [34] X. Jing, Y. Zhang, H. Jiang, Y. Cheng, N. Xing, C. Meng, *J. Alloys Compd.* **2018**, *763*, 180.
- [35] F. Azadian, A. C. Rastogi, *Electrochim. Acta* **2020**, *330*, 135339.
- [36] B. Patil, S. Ahn, C. Park, H. Song, Y. Jeong, H. Ahn, *Energy* **2018**, *142*, 608.
- [37] S. Peng, L. Yu, P. Kakvand, M. S. Rahmanifar, G. Zhang, M. Kong, J. Zhu, S. Tang, R. Ren, M. S. Faber, Z. Li, X. Yu, F. Su, M. Miao, **n.d.**
- [38] R. B. Pujari, G. S. Gund, S. J. Patil, H. S. Park, D. W. Lee, *J. Mater. Chem. A* **2020**, *8*, 3901.
- [39] S. Liu, B. Li, S. V. Mohite, P. Devaraji, L. Mao, R. Xing, *Int. J. Hydrogen Energy* **2020**, *45*, 29929.
- [40] S. Materials, S. D. B. K. Sharma, A. Stoesser, S. K. Mondal, S. K. Garlapati, M. H. Faway, V. S. K. Chakravadhanula, R. Kruk, H. Hahn,

*ACS Appl. Mater. Interfaces* **2018**, *10*, 0.

- [41] D. V. Shinde, L. De Trizio, Z. Dang, M. Prato, R. Gaspari, L. Manna, *Chem. Mater.* **2017**, *29*, 7032.
- [42] G. E. Ayom, M. D. Khan, T. Ingsel, W. Lin, R. K. Gupta, S. J. Zamisa, W. E. van Zyl, N. Revaprasadu, *Chem. - A Eur. J.* **2020**, *26*, 2693.
- [43] M. A. Ehsan, A. Rehman, A. Afzal, A. Ali, A. S. Hakeem, U. A. Akbar, N. Iqbal, *Energy and Fuels* **2021**, *35*, 16054.
- [44] X. Feng, Q. Jiao, T. Liu, Q. Li, M. Yin, Y. Zhao, H. Li, C. Feng, W. Zhou, *ACS Sustain. Chem. Eng.* **2018**, *6*, 1863.
- [45] C. Gervas, M. D. Khan, C. Zhang, C. Zhao, R. K. Gupta, E. Carleschi, B. P. Doyle, N. Revaprasadu, *RSC Adv.* **2018**, *8*, 24049.
- [46] M. H. Han, M. W. Pin, J. H. Koh, J. H. Park, J. Kim, B. K. Min, W. H. Lee, H. S. Oh, *J. Mater. Chem. A* **2021**, *9*, 27034.
- [47] T. A. Ho, C. Bae, H. Nam, E. Kim, S. Y. Lee, J. H. Park, H. Shin, *ACS Appl. Mater. Interfaces* **2018**, *10*, 12807.
- [48] S. Liu, B. Liu, C. Gong, Z. Li, *Appl. Surf. Sci.* **2019**, *478*, 615.
- [49] W. Adamson, C. Jia, Y. Li, C. Zhao, *Electrochim. Acta* **2020**, *355*, 136802.
